# Supplementary material for: In Xenopus ependymal cilia drive embryonic CSF circulation and brain development independently of cardiac pulsatile forces
Source: Springer Nature journal article supplement (doi:10.1186/s12987-020-00234-z), 2020-12-01

# *Xenopus tropicalis* ventricular development map by OCT imaging

**A**

Mid-sagittal plane

Mid-sagittal plane

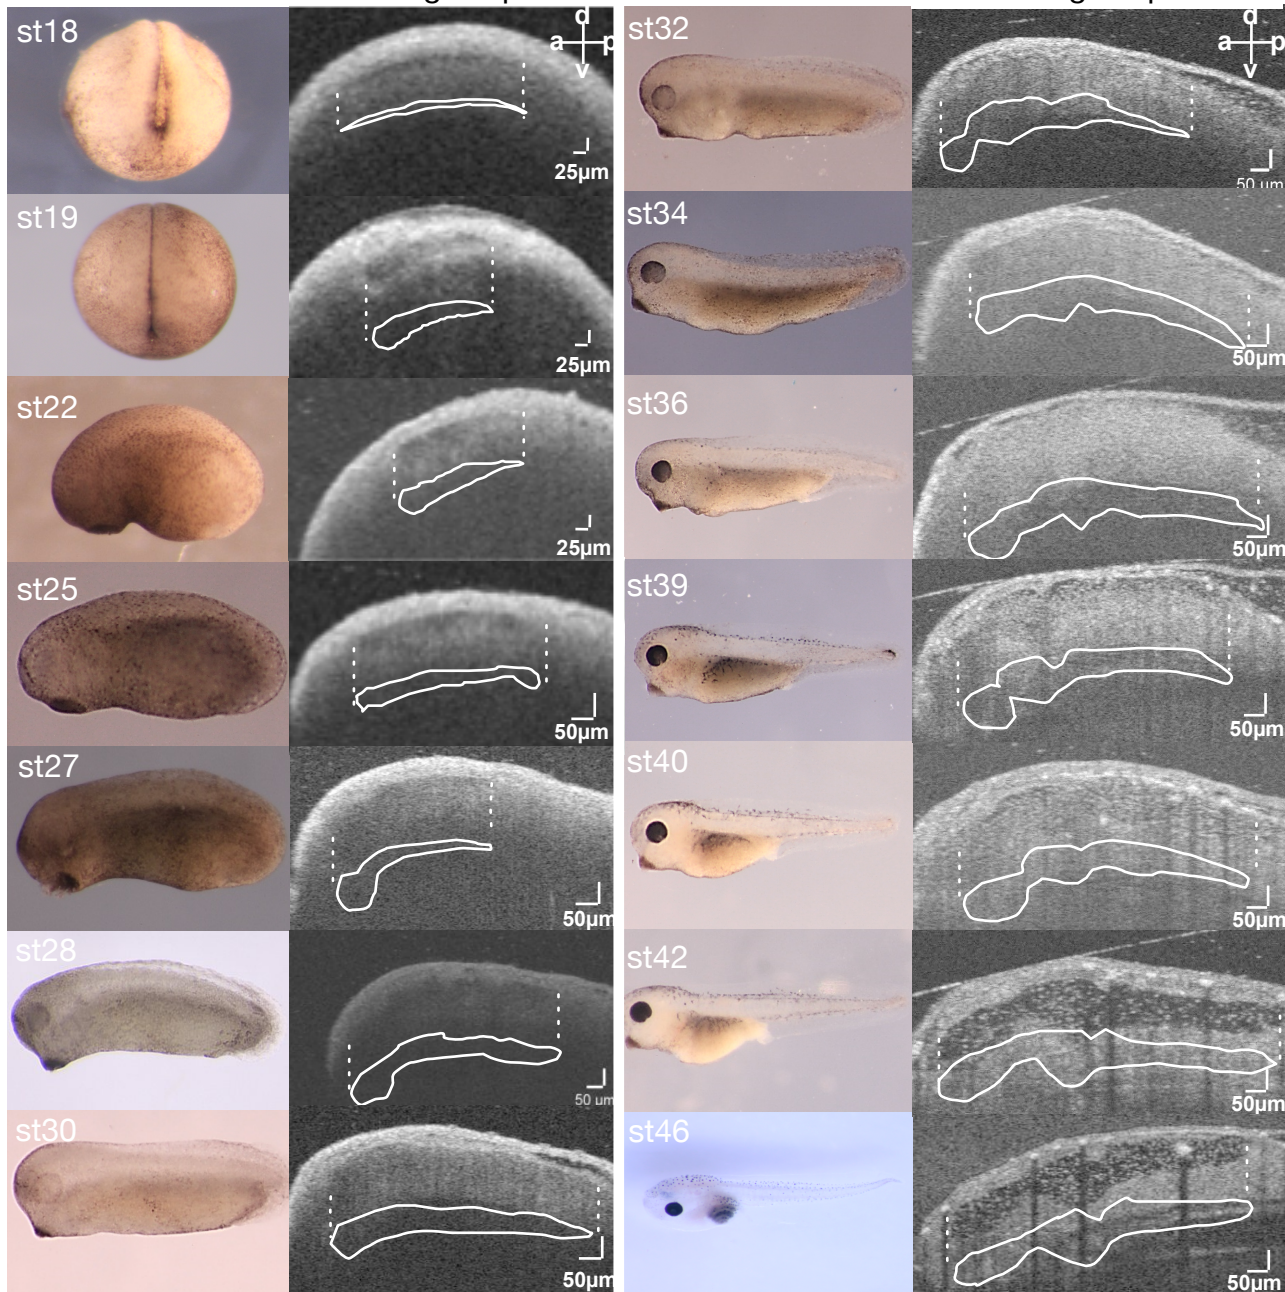

**B** DORSAL → VENTRAL

Mid-Sagittal Plane

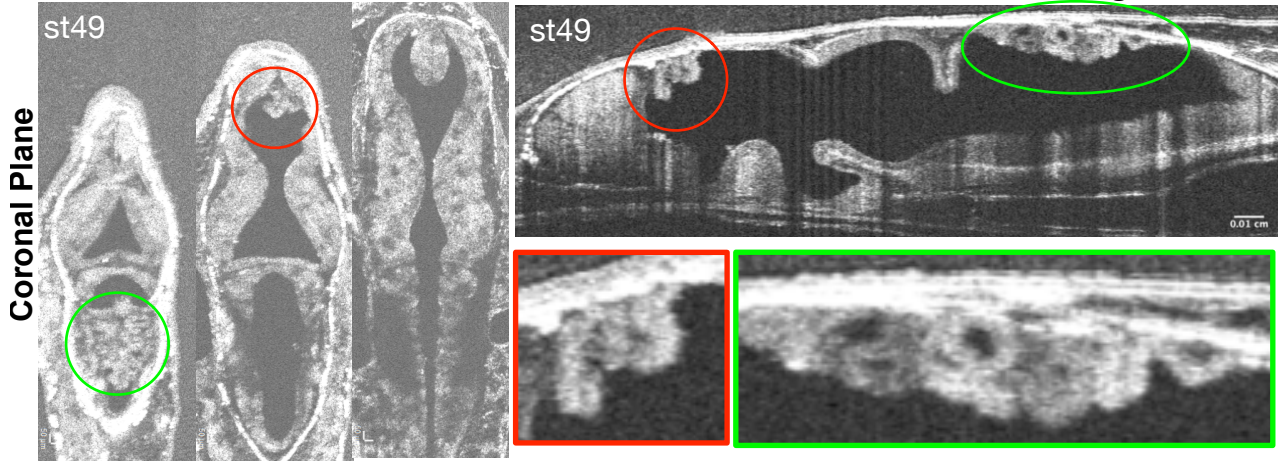

Supplement: MOESM1 [file 18676638]
