# Supplementary material for: In Xenopus ependymal cilia drive embryonic CSF circulation and brain development independently of cardiac pulsatile forces
Source: Springer Nature journal article supplement (doi:10.1186/s12987-020-00234-z), 2020-12-01

Stage 46 *Xenopus laevis*

GT355

A

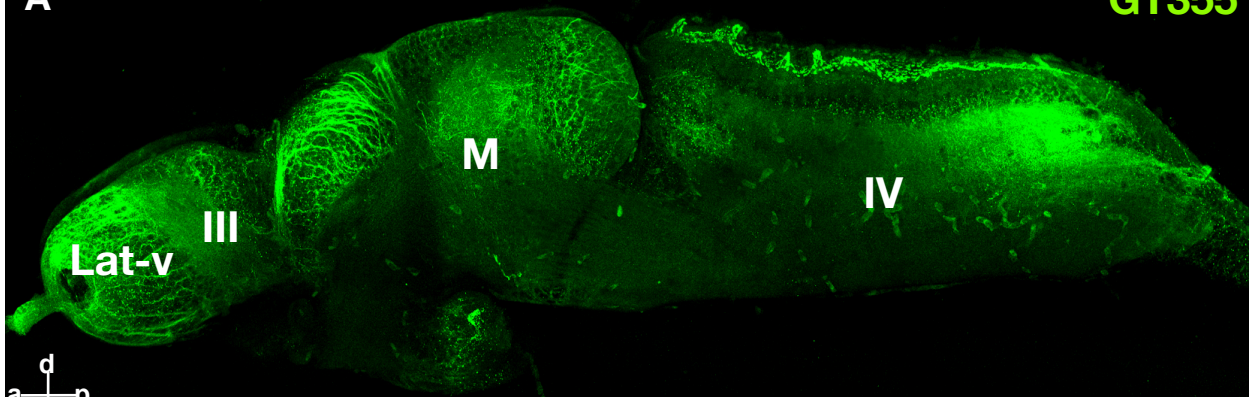

A'

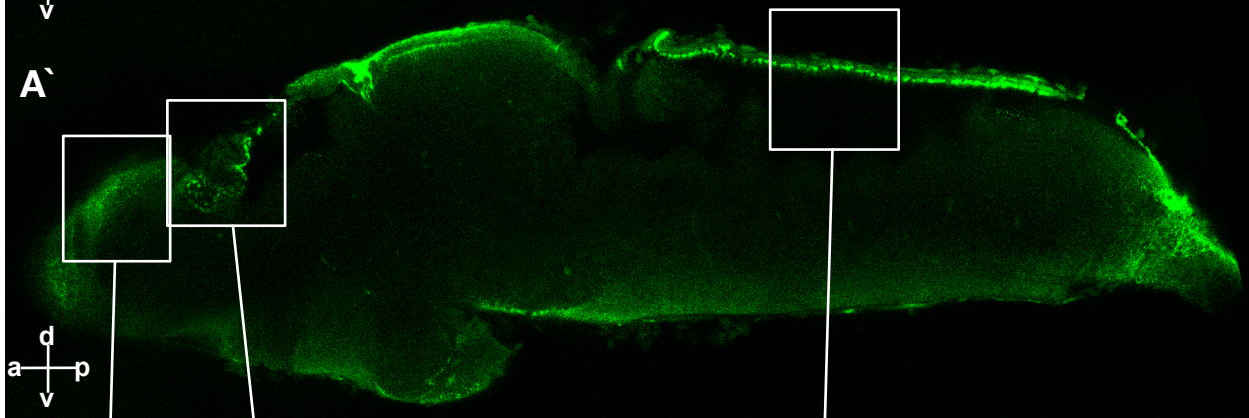

B

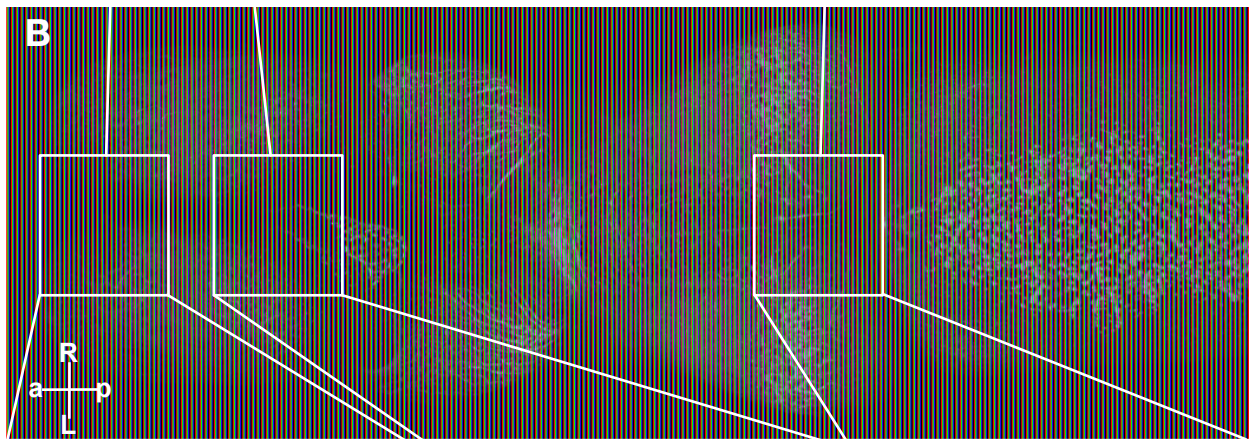

(B1)

(B2)

(B3)

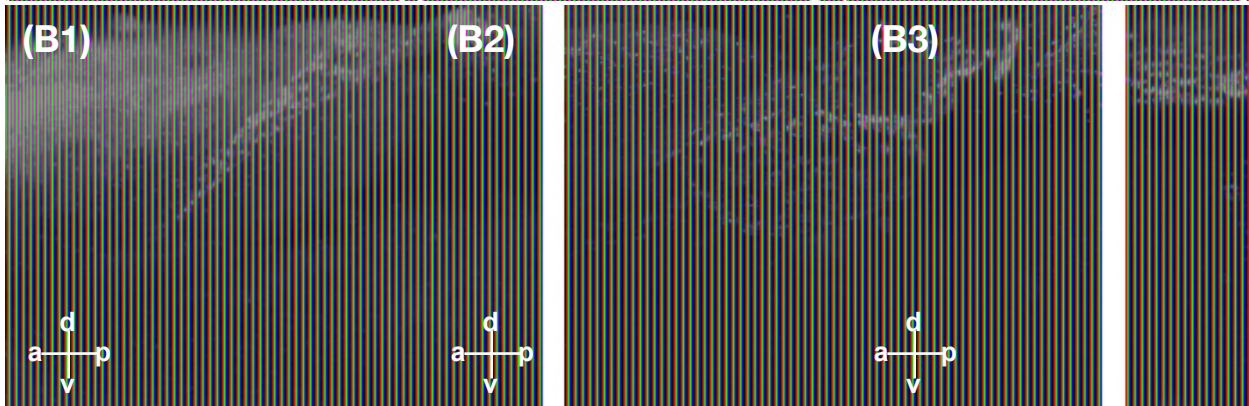

Supplement: MOESM14 [file 18676638]
