# Supplementary material for: In Xenopus ependymal cilia drive embryonic CSF circulation and brain development independently of cardiac pulsatile forces
Source: Springer Nature journal article supplement (doi:10.1186/s12987-020-00234-z), 2020-12-01

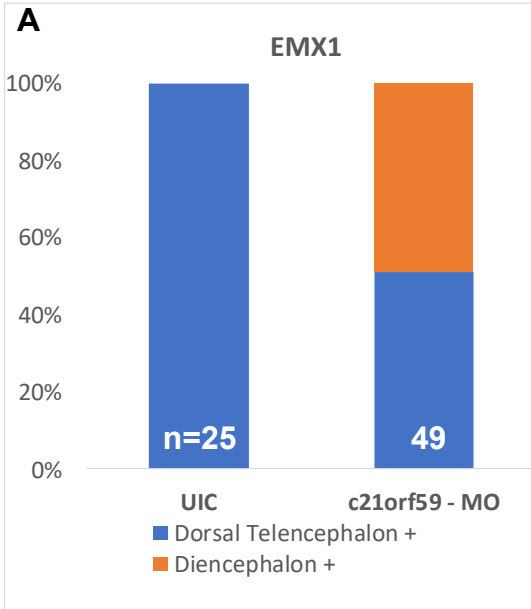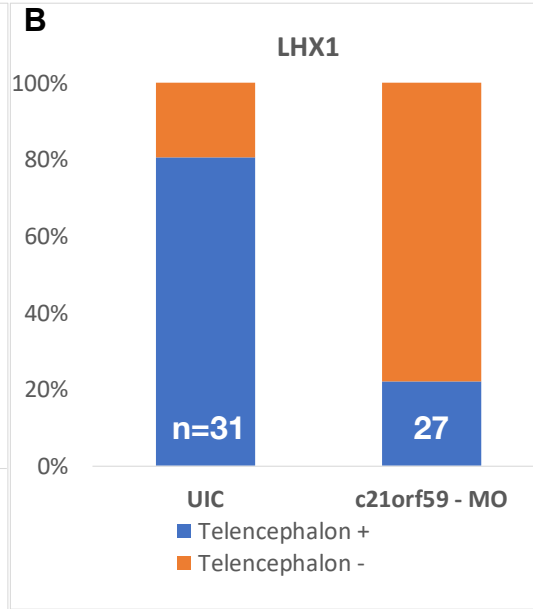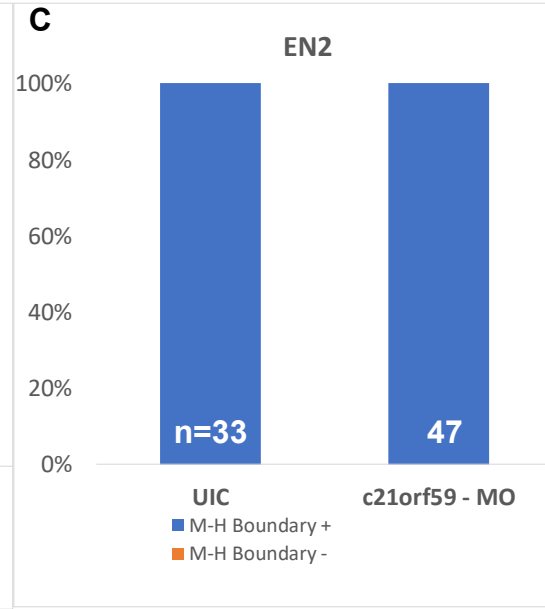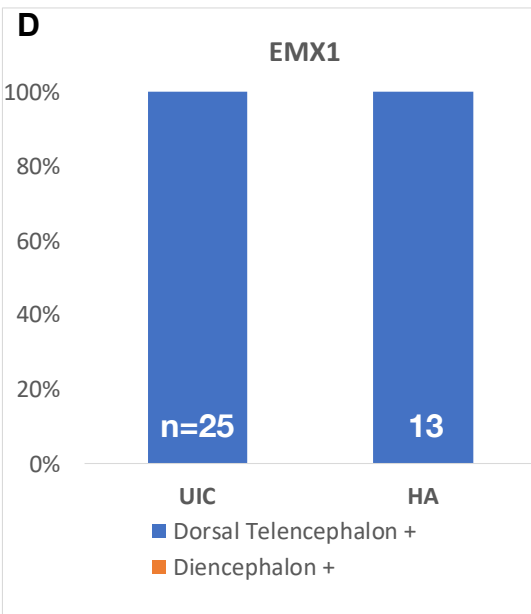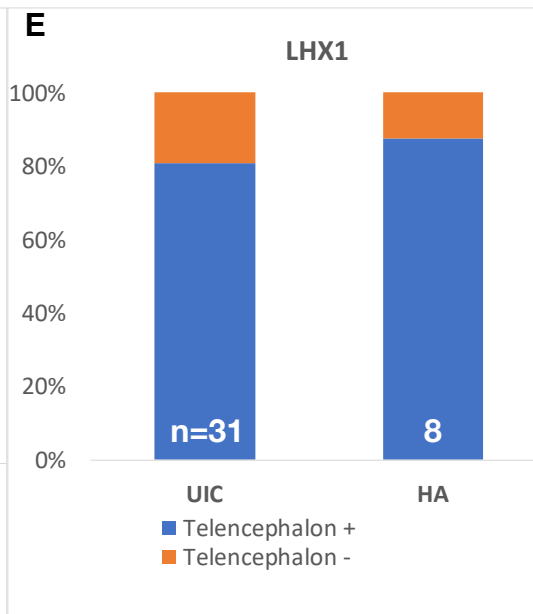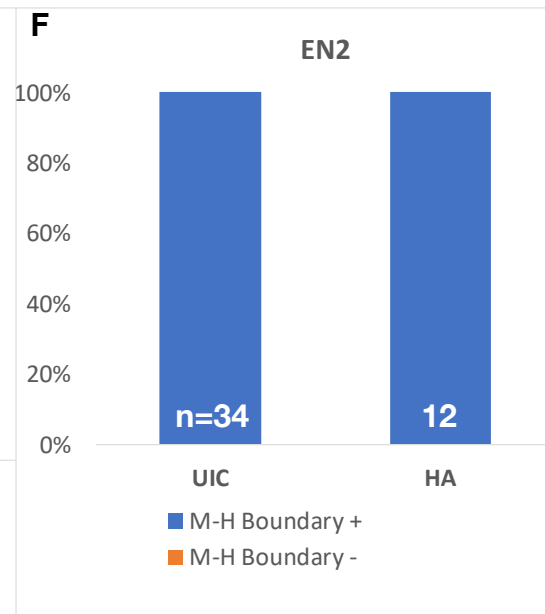

Supplement: MOESM15 [file 18676638]
